## **MERS-CoV NSP16 necessary for IFN resistance and viral pathogenesis.**

Vineet D. Menachery<sup>1,2</sup>, Lisa E. Gralinski<sup>2</sup>, Hugh D. Mitchell<sup>4</sup>, Kenneth H. Dinno III<sup>2</sup>, Sarah R. Leist<sup>2</sup>, Boyd L. Yount Jr.<sup>2</sup>, Rachel L. Graham<sup>2</sup>, Eileen T. McAnarney<sup>2</sup>, Kelly G. Stratton<sup>4</sup>, Adam S. Cockrell<sup>2</sup>, Kari Debbink<sup>5</sup>, Amy C. Sims<sup>2</sup>, Katrina M. Waters<sup>4</sup>, Ralph S. Baric<sup>2,3</sup>.

<sup>1</sup>Department of Microbiology and Immunology, University of Texas Medical Branch, Galveston, TX, USA

<sup>2</sup>Departments of Epidemiology and <sup>3</sup>Microbiology and Immunology, University of North Carolina at Chapel Hill, Chapel Hill, NC, USA

<sup>4</sup>Pacific Northwest National Laboratory, Richland, Washington, USA

<sup>5</sup>Department of Natural Sciences, Bowie State University, Bowie, MD, USA

**Corresponding Author:** Ralph S. Baric

**Address:** University of North Carolina at Chapel Hill, 2107 McGavran-Greenberg Hall  
CB 7435, Chapel Hill, NC 27599-7435

**Telephone:** 919-966-7991 **Fax:** 919-966-0584

**Email:** [Rbaric@email.unc.edu](mailto:Rbaric@email.unc.edu)

1 **Abstract**

2 Coronaviruses encode a mix of highly conserved and novel genes as well as genetic elements  
3 necessary for infection and pathogenesis, raising the possibility for common targets for  
4 attenuation and therapeutic design. In this study, we focus on the highly conserved non-  
5 structural protein (NSP) 16, a viral 2'O methyl-transferase (MTase) that encodes critical  
6 functions in immune modulation and infection. Using reverse genetics, we disrupted a key motif  
7 in the conserved KDKE motif of MERS NSP16 (D130A) and evaluated the effect on viral  
8 infection and pathogenesis. While the absence of 2'O MTase activity had only marginal impact  
9 on propagation and replication in Vero cells, the MERS dNSP16 mutant demonstrated  
10 significant attenuation relative to control both in primary human airway cultures and *in vivo*.  
11 Further examination indicated the MERS dNSP16 mutant had a type I IFN based attenuation  
12 and was partially restored in the absence of IFIT molecules. Importantly, the robust attenuation  
13 permitted use of MERS dNSP16 as a live attenuated vaccine platform protecting from challenge  
14 with a mouse adapted MERS-CoV strain. These studies demonstrate the importance of the  
15 conserved 2'O MTase activity for CoV pathogenesis and highlight NSP16 as a conserved  
16 universal target for rapid live attenuated vaccine design in an expanding CoV outbreak setting.

1 **Significance**

2 Coronavirus emergence in both human and livestock represents a significant threat to global  
3 public health, as evidenced by the sudden emergence of SARS-CoV, MERS-CoV, PEDV and  
4 swine delta coronavirus in the 21<sup>st</sup> century. These studies describe an approach that effectively  
5 targets the highly conserved 2'O methyl-transferase activity of coronaviruses for attenuation.  
6 With clear understanding of the IFN/IFIT based mechanism, NSP16 mutants provide a suitable  
7 target for a live attenuated vaccine platform as well as therapeutic development for both current  
8 and future emergent CoV strains. Importantly, other approaches targeting other conserved pan-  
9 coronavirus functions have not yet proven effective against MERS-CoV, illustrating the broad  
10 applicability of targeting viral 2'O MTase function across coronaviruses.

11

## 1 Introduction

2 The emergence of Middle East Respiratory Syndrome Coronavirus (MERS-CoV) in 2012  
3 represents the second severe coronavirus to strike the human population since the beginning of  
4 the 21<sup>st</sup> century (1). Similar to its predecessor severe acute respiratory syndrome (SARS) CoV,  
5 MERS-CoV is characterized by severe lung infection and high mortality rates (2). Associated  
6 with elderly patients and nosocomial spread, MERS-CoV is likely harbored in camel populations  
7 with periodic reintroductions into humans, followed by periodic nosocomial outbreaks in hospital  
8 settings (3). Importantly, with the continued rate of globalization, MERS-CoV remains an  
9 ongoing threat for future outbreaks both in and outside the Middle East, as evidenced by the  
10 large outbreak in South Korea (4). Together, these factors highlight the importance of examining  
11 CoV pathogenesis and developing conserved therapeutic targets for treatment of current and  
12 future emergent strains.

13 Like all members of the CoV family, MERS-CoV maintains a balance of conserved and  
14 novel viral proteins within its genome (5). A member of the group 2C coronavirus family, a  
15 wealth of distinct accessory open reading frame (ORF) and non-structural proteins (NSPs) have  
16 already been established to have important roles in modulating the host immune response (6).  
17 Similarly, a number of highly conserved viral proteins for structure, replication, and fidelity are  
18 also maintained in the CoV backbone (7). Among these, MERS-CoV NSP16 provides a potent  
19 target for therapeutic development. A 2'O methyl-transferase, coronavirus NSP16 has been  
20 implicated in capping viral RNA and preventing its recognition by intracellular sensor MDA5 and  
21 antiviral effectors including IFIT family members (8). Generation of mutants within the NSP16  
22 KDKE active site resulted in IFN mediated *in vitro* and *in vivo* attenuation of both mouse  
23 hepatitis virus and SARS-CoV (9, 10). As such, an approach targeting MERS-CoV NSP16 might  
24 be anticipated to result in attenuation and potentially provide a universal platform for CoV  
25 vaccines against future emergent strains.

1           Using reverse genetics to target residues in the highly conserved active site, we  
2 evaluated MERS-CoV infection outcomes in the context of an inactive NSP16 (dNSP16).  
3 Consistent with previous studies in SARS-CoV (10), the dNSP16 MERS-CoV mutant  
4 maintained no significant attenuation in terms of replication or the initial host immune response.  
5 However, both primary human airway epithelial cells and *in vivo* studies in a MERS-CoV mouse  
6 model demonstrated robust attenuation of dNSP16 mutant growth and pathogenesis. Notably,  
7 attenuation was both IFN and IFIT1 dependent providing a clear mechanism for attenuation.  
8 Importantly, the dNSP16 mutant also provided robust protection against a lethal MERS-CoV  
9 challenge and maintained attenuation in the mouse adapted backbone. Together, the results  
10 illustrate the broad conservation and necessity of NSP16 in CoV pathogenesis and highlight  
11 targeting this protein as a rapid response platform for future emergent CoV strains.

## 1 **Results**

2 A combination of structural and biochemical approaches has established a critical role for CoV  
3 NSP16 in 2'O methyltransferase activity (**Fig. 1A**). Stabilized by interactions with NSP10  
4 (orange), NSP16 relies on a highly conserved KDKE motif (red) to mediate its activity (11).  
5 Previous alteration of this motif in both group 2b SARS-CoV (10) and group 2a MHV (9)  
6 disrupted 2'O methyltransferase activity and attenuated varying aspects of infection. Based on  
7 high conservation across the CoV family (**Fig. 1B**), we hypothesized that disruption of the KDKE  
8 motif would also attenuate other emerging CoV families, including the group 2c MERS-CoV.  
9 Utilizing a MERS-CoV reversed genetic system (12), we disrupted the KDKE motif by mutating  
10 two nucleotides to produce a D130A change (**Fig. 1A**). The resulting disrupted NSP16 mutant  
11 (dNSP16) had no significant defect noted in stock titer generation (not shown); similarly, low  
12 MOI infection of both Vero cells and Calu3 cells, a respiratory epithelial cell line, demonstrated  
13 only modest attenuation at late time points (**Fig. 1C & D**). Together, these results indicate that  
14 NSP16 activity is not required for replication capacity.

### 15 *In vitro* host response similar between SARS and MERS dNSP16 mutants.

16 Having established replication competence in both Vero and Calu3 cells, we next evaluated  
17 induction of host pathways following infection. Calu3 cells infected at MOI 5 demonstrated no  
18 differences in replication (not shown) and only modest differences in host induction (0 genes  
19 fold expression  $g > 1.5 \log_2$ ). Unlike previous studies with SARS-CoV, rapid cytopathic effect  
20 (CPE) by 24 hours limited analysis to early time points. Further DAVID based-analysis  
21 compared network host responses between MERS-CoV and SARS-CoV dNSP16 (**Fig. 2**).  
22 Over the first 24 hours of infection, both MERS-CoV and SARS-CoV dNSP16 showed no  
23 significant functional enrichment of any categories relative to corresponding wild-type (WT)  
24 infections, consistent with the lack of replication attenuation. However, at late times (>24 hours  
25 post infection), SARS-CoV produces robust changes in several host pathways including  
26 cytokine responses, inflammation, and extracellular activity. Similarly, changes in apoptosis,

1 transcription repression, and regulation of phosphorylation indicated a host response more  
2 hostile to viral infection. While more rapid CPE following MERS-CoV dNSP16 infection  
3 precluded an equivalent finding at late time points, the SARS-CoV results suggest that the  
4 absence of NSP16 activity eventually initiates host response changes that contribute to  
5 attenuation at late time points.

#### 6 MERS-CoV dNSP16 attenuated in primary and *in vivo* models.

7 To further examine the replicative capacity of dNSP16, we infected both human airway models  
8 and mice expressing human dipeptidyl peptidase 4 (DPP4), the receptor for MERS-CoV.  
9 Primary human airway cultures (HAE) were challenged with wild-type and dNSP16 MERS-CoV  
10 at a low MOI (**Fig. 3A**). While robust replication was observed following wild-type infection,  
11 dNSP16 MERS mutant had significant attenuation that corresponded well to previous results  
12 seen with SARS-CoV dNSP16 (10). We next examined MERS dNSP16 replication phenotypes  
13 in the context of *in vivo* infection using an adenovirus transduction model of BALB/c mice (13).  
14 While neither infection produced weight loss (not shown), WT MERS-CoV replicated efficiently  
15 at both day 2 and day 4 post infection (**Fig. 3B**); in contrast, no detectable replication was seen  
16 following infection with the MERS dNSP16 mutant. The lack of replication may be due to  
17 residual interferon responses associated with initial adenovirus infection. For greater clarity, we  
18 next infected CRISPR/CAS9 targeted mice that include mutations in mouse *Dpp4* at position  
19 288 and 330 (288-330<sup>+/+</sup>) conferring efficient wild-type MERS-CoV infection and growth in mice,  
20 but no clinical disease (14). Following infection, no changes were observed in weight loss in  
21 either mice, consistent with previous findings (data not shown). However, absence of NSP16  
22 activity severely attenuated dNSP16 replication at both day 2 and day 4 post infection (**Fig. 3C**).  
23 Coupled with data from HAE cultures and the adenovirus model, the results demonstrate clear  
24 attenuation of MERS dNSP16 relative to control.

#### 25 dNSP16 MERS-CoV attenuation mediated by IFN and IFIT1.

1 Having established a deficit in MERS NSP16 mutant replication in relevant *in vitro* and *in vivo*  
2 models, we next sought to evaluate the mechanism of attenuation. Previous work by our lab and  
3 others had established increased susceptibility of NSP16 mutants to type I IFN (9, 10). While  
4 both viruses were sensitive to IFN treatment, the MERS dNSP16 mutant had a significant  
5 reduction in viral replication relative to control virus (**Fig. 4A**). These results are consistent with  
6 reports for NSP16 mutants in other coronaviruses (8). Extending this analysis further, we  
7 examined the role of *IFIT1* and *IFIT2* gene expression on this attenuation phenotype. Similar to  
8 SARS-CoV, knockdown of *IFIT1* augmented replication of the MERS dNSP16 mutant in the  
9 context of type I IFN pretreatment (**Fig. 4B**). In addition, knockdown augmented WT MERS-CoV  
10 infection, suggesting sensitivity to *IFIT1* activity despite the presence of NSP16. Notably, *IFIT2*  
11 knockdown had only a modest, non-significant impact on replication, contrasting results seen  
12 with SARS-CoV. Overall, the data indicates that MERS dNSP16 attenuation is driven by  
13 sensitivity to type I IFN mediated by the activity of *IFIT1*.

#### 14 NSP16 mutant vaccination protects from lethal MERS-CoV challenge.

15 Based on IFN and IFIT1 attenuation phenotypes, targeting NSP16 offers a potential platform  
16 strategy for live attenuated vaccine generation. While previous work by our group had shown  
17 that the dNSP16 mutant of SARS-CoV conferred protection to lethal challenge, similar  
18 phenotypes in other more distant coronaviruses are essential for establishing universal  
19 principles of attenuation across a virus family. To test this hypothesis, DPP4 288/330<sup>+/+</sup> mice  
20 were vaccinated with the wild-type MERS dNSP16 mutant and subsequently challenged with a  
21 mouse adapted MERS-CoV strain (**Fig. 5**) (14). Following challenge, dNSP16 vaccinated mice  
22 produced only modest weight loss, significantly contrasting severe disease seen in the control  
23 group (**Fig. 5A**). In addition, both viral replication and lung hemorrhage were significantly  
24 reduced in the context of the dNSP16 vaccine (**Fig. 5B & C**). Importantly, serum analysis  
25 revealed robust virus neutralization with values similar to sera from wild-type infected mice (**Fig.**  
26 **5D**). Together, the results indicate that the dNSP16 MERS-CoV mutant can function as a



1 vaccine platform that not only induces high levels of neutralizing antibodies, but provides  
2 compete protection from lethal MERS-CoV challenge.

3 NSP16 mutation attenuates mouse adapted MERS-CoV.

4 Despite conferring protection in the wild-type MERS-CoV backbone, it was unclear if the NSP16  
5 mutant would be sufficiently attenuated in a virulent MERS backbone. To address this question,  
6 we inserted the dNSP16 mutation (D130A) into the mouse adapted MERS-CoV backbone (14).  
7 Following infection, mouse adapted icMERS-CoV produced rapid weight loss and lethality (**Fig.**  
8 **6A**). In contrast, the mouse adapted dNSP16 mutant had only modest weight loss and 100%  
9 survival following infection. In addition, viral replication of the dNSP16 mutant was significantly  
10 attenuated relative to WT at days 2 and 4 post infection (**Fig. 6B**). Finally, hemorrhage scoring  
11 of the lung revealed minimal disease in dNSP16 relative to control mice at day 4 post infection  
12 (**Fig. 6C**). Overall, the results demonstrate robust attenuation of MERS-CoV pathogenesis in the  
13 context a NSP16 mutation.

14

## 1 Discussion

2 In the context of the ongoing MERS-CoV outbreak, the development of universal  
3 platform strategies to attenuate emerging and contemporary coronaviruses is a significant  
4 priority. In this study, we demonstrate the critical importance of NSP16 function to MERS-CoV  
5 pathogenesis *in vitro* and *in vivo*. Similar to MHV and SARS-CoV (9, 10), the disruption of 2'O  
6 MTase activity in MERS-CoV had no significant impact on replication or early host response  
7 patterns *in vitro*. However, the dNSP16 MERS mutant demonstrated attenuated replication and  
8 growth in primary human airway cultures as well as reduced disease *in vivo*, relative to WT  
9 virus. Further examination revealed increased sensitivity to type I IFN in an IFIT dependent  
10 manner. Notably, this IFN/IFIT based attenuation phenotype provided robust protection from a  
11 lethal challenge following vaccination with the dNSP16 mutant. Importantly, the NSP16 mutant  
12 also was fully attenuated in a highly virulent mouse-adapted MERS-backbone. These results,  
13 coupled with previous work in other CoVs, highlight the viral 2'O MTase activity as a potential  
14 universal platform for therapeutic treatment and vaccine development for current and future  
15 emergent human and animal CoVs.

16 The attenuation of the MERS-CoV NSP16 mutant also provides evidence for targeting  
17 viral 2'O MTase as a global therapeutic strategy against emergent RNA viruses. Previous work  
18 in both flaviviruses and coronaviruses has demonstrated robust attenuation by targeting the  
19 conserved KDKE motif of the viral 2'O MTase (8, 15, 16). Importantly, 2'O MTase activity is the  
20 only known function for NSP16 and it appears completely dispensable for CoV replication in the  
21 absence of a strong IFN response (8). In contrast, flaviviruses without nsp5 encoded MTase  
22 activity are much more sensitive to innate immune responses (17); mutants in West Nile virus,  
23 Dengue, and Japanese encephalitis virus are highly replication attenuated at early time points  
24 (18, 19). While diminished virus yields likely reduces flaviruses vaccine utility *in vivo*, robust  
25 propagation of both MERS and SARS-CoV dNSP16 mutants provide a useful parameter for  
26 vaccine generation. For both viral families, drugs targeting 2'O MTase activity may have great

1 efficacy if paired with stimulation of the interferon responsive genes including IFIT1 (8, 15).  
2 Overall, the results indicate that viral 2' O MTase activity is a critical viral determinant for  
3 pathogenesis and can be leveraged to develop therapeutic treatments.

4 NSP16 also represents the third highly conserved CoV protein targeted as the basis of a  
5 vaccine platform. Previous work by our group demonstrated the importance of CoV fidelity on  
6 infection and pathogenesis (20); disrupting the exonuclease activity of NSP14 rendered an  
7 attenuated, reversion proof virus in both MHV and SARS-CoV (20-22). For SARS-CoV, the  
8 disruption served as the basis of a successful live attenuated vaccine (20). Similarly, groups  
9 have targeted the envelope protein of SARS-CoV and defined a key inflammatory role for E  
10 protein in pathogenesis. SARS mutants targeting E function also conferred protection from  
11 lethal challenge (23, 24). For both NSP14 and E mutants, fidelity and inflammation induction are  
12 partially responsible for attenuation. However, both viral mutants also maintain replication  
13 attenuated in terms of kinetics and yields, potentially complicating their use as a vaccine  
14 platforms, especially in outbred populations (20, 24). Importantly, the NSP14 mutant has not yet  
15 been recovered within the context of MERS-CoV and failure has been reported in group I  
16 coronaviruses (25). Similarly, disruption of the E protein renders MERS-CoV, TGEV and MHV  
17 replication deficient without exogenous complementation (26-28); this broad attenuation of the  
18 delta E mutant potentially limits its use as a live attenuated vaccine. In contrast, MERS dNSP16  
19 mutant maintains robust propagation as well as IFN/IFIT based attenuation phenotypes.  
20 Together, these results suggest that targeting NSP16 may be the most broadly applicable  
21 platform for CoV attenuation.

22 Despite the success of NSP16 mutants in protection studies with SARS and MERS-CoV,  
23 several additional parameters must be considered in the context of coronavirus vaccination.  
24 Previous work by our group has demonstrated failure of CoV subunit vaccines in aged animals  
25 and in the context of heterologous challenge (29). With the aged representing a population with  
26 high mortality and marginal vaccination success, efficacy of the NSP16 mutant in this population

1 is paramount in its pursuit as a platform. Similarly, the existence of numerous CoVs in animal  
2 populations raises the concerns for heterologous challenge from emergent viruses (30, 31).  
3 Prior reports had also demonstrated vaccine induced disease following heterologous challenge  
4 with related SARS-like viruses (29, 32). With this in mind, NSP16 vaccinated mice will need to  
5 be examined in the context of heterologous challenge to determine if vaccine induced pathology  
6 occurs. Together, these two factors represent important checkpoints in the pursuit of NSP16 as  
7 a universal CoV vaccine platform.

8 In addition to aging and heterologous challenge, reversion and baseline pathogenesis  
9 also represent important risks that must be evaluated in the context of an NSP16 vaccine. While  
10 the NSP14 SARS vaccine was absent sterilizing immunity in immunodeficient mice, the lack of  
11 reversion over time *in vivo* indicates safety in the approach (20). In contrast, passage of the E  
12 mutant rendered a novel mutant that transplanted a critical ion channel function from another  
13 viral protein and thus restoring partial virulence (33). Studies examining reversion potential of  
14 NSP16 are critical prior to use as a vaccine; these concerns are especially important  
15 considering both the SARS and MERS dNSP16 mutants have robust replications permitting  
16 additional opportunities for reversion (10). In addition, equivalent host immune responses during  
17 the early infection may produce substantial damage prior to IFN/IFIT based attenuations, most  
18 notably in aged and immunocompromised mice. Therefore, despite the promise of successful  
19 attenuation in multiple CoV backbones, several additional metrics must be examined prior to  
20 using NSP16 mutants as a universal CoV vaccine platform.

21 Overall, the current study demonstrates that targeting 2'O MTase activity is a robust  
22 strategy to attenuate MERS-CoV and other emergent coronaviruses. In the absence of NSP16  
23 activity, the MERS-CoV mutant is sensitive to type I IFN in an IFIT dependent manner providing  
24 clear mechanism for attenuation. Importantly, unlike other conserved CoV platforms, the NSP16  
25 mutant is both viable and robust enough to be utilized as an effective live-attenuated vaccine.  
26 While further vaccine characterization is required, the results indicate that disruption of CoV

- 1 NSP16 activity can be the basis for therapeutic strategies for both current and future emergent
- 2 CoV infection both in human and animal populations.
- 3

## 1 **Methods & Materials**

2 **Cells & Viruses.** Wild-type, mutant, and mouse adapted MERS-CoV were previously described  
3 (12, 14) and cultured on Vero 81 cells, grown in DMEM or Optimem (Gibco, CA) and 5% Fetal  
4 Clone Serum (Hyclone, South Logan, UT) along with antibiotic/antimycotic (Gibco, Carlsbad,  
5 CA). Growth curves in Vero, Calu-3 2B4, and human airway epithelial cells were performed as  
6 previously described (9, 31). Briefly, cells were washed with PBS, and inoculated with virus or  
7 mock diluted in PBS for 40 minutes at 37 °C. Following inoculation, cells were washed 3 times,  
8 and fresh media added to signify time 0 hr. Samples were harvested at the described time  
9 points. For IFN pretreatments, 100 units/mL of recombinant human IFN $\beta$  (PBL Laboratories)  
10 was added to cells 16 hours prior to inoculation and infected as described above. Stable shRNA  
11 knockdown Vero cell lines for IFIT1 and IFIT2 were previously described (10). All virus  
12 cultivation was performed in a BSL3 laboratory with redundant fans in Biosafety Cabinets as  
13 described previously by our group (32, 33). All personnel wore Powdered Air Purifying  
14 Respirator (3M breathe easy) with Tyvek suits, aprons, booties and were double-gloved.

15 **Construction of Wild-type and Mutant NSP16 Viruses.** Both wild-type and mutant viruses  
16 were derived from either MERS-CoV EMC or corresponding mouse adapted (MA1) infectious  
17 clone as previously described (12). For NSP16 mutant construction, the D130A mutation  
18 changed the sequence from MERS E fragment cloned within the pSMART vector (Lucigen) was  
19 used for Alanine scanning mutagenesis of conserved residues in nsp16. For the D130A change,  
20 a product was generated by PCR using primers against MERS-CoV NSP16. Fragment 1:  
21 EMC:E#2(+): TGAACTACCTGTAGCTGTAG EMC:EmuC(-):  
22 NNNNNNGCTCTTCTCGCGGAAATAACAAGATCCACTTG; Fragment 2: EMC:EmuC(+):  
23 NNNNNNGCTCTTCCGCGATGTATGATCCTACTACTAAG EMC:E#6(-):  
24 CAACCTCAATACAAGCAGAC. The two resulting products were digested with SapI  
25 (underlined) and ligated overnight with T4 DNA ligase. This product was then digested with

1 PpuMI and NsiI and used to replace the region of the EMC E plasmid (puc57) which had been  
2 similarly digested. Thereafter, plasmids containing wild-type and mutant MERS-CoV genome  
3 fragments were amplified, excised, ligated, and purified. *In vitro* transcription reactions were  
4 then performed to synthesize full-length genomic RNA, which was transfected into Vero E6  
5 cells. The media from transfected cells were harvested and served as seed stocks for  
6 subsequent experiments. Viral mutants were confirmed by sequence analysis prior to use.  
7 Synthetic construction of mutants of NSP16 were approved by the University of North Carolina  
8 Institutional Biosafety Committee.

9 **RNA isolation, microarray processing and identification of differential expression.** RNA  
10 isolation and microarray processing, quality control, and normalization from Calu-3 cells was  
11 carried out as previously described (34). Differential expression (DE) was determined by  
12 comparing virus-infected replicates to time-matched mock replicates. Criteria for DE in  
13 determining the consensus ISG list were an absolute  $\text{Log}_2$  fold change of  $>1.5$  and a false  
14 discovery rate (FDR)-adjusted  $P$  value of  $<0.05$  for a given time point.

15 **Clustering and Functional Enrichment.** Genes identified as differentially expressed were  
16 used to generate clustered expression heat maps. Hierarchical clustering (using Euclidean  
17 distance and complete linkage clustering) was used to cluster gene expression according to  
18 behavior across experimental conditions. The DAVID online resource ([david.ncifcrf.gov](http://david.ncifcrf.gov)) was  
19 used to acquire functional enrichment results for the genes in each cluster. DAVID output was  
20 manually summarized for each cluster. Plots were generated with R.

21 **Ethics Statement.** This study was carried out in accordance with the recommendations for care  
22 and use of animals by the Office of Laboratory Animal Welfare (OLAW), National Institutes of  
23 Health. The Institutional Animal Care and Use Committee (IACUC) of The University of North  
24 Carolina at Chapel Hill (UNC, Permit Number A-3410-01) approved the animal study protocol  
25 (IACUC Protocol #15-009 and 13-072) followed in this manuscript.

1 **Mouse Infections and Vaccinations.** 10-20 week old BALB/c (Envigo/Harlan) or  
2 CRISPR/Cas9 288-330<sup>+/+</sup> C57BL/6 mice were anaesthetized with ketamine and Xylazine (as  
3 per IACUC, UNC guidelines) and intranasally inoculated with a 50  $\mu$ l volume containing  $10^6$   
4 plaque forming units (pfu) of MERS-CoV WT, MERS-CoV dNSP16 virus, mouse adapted  
5 variants, or PBS mock as indicated in the figure legends. Infected animals were monitored for  
6 weight loss, morbidity, clinical signs of disease, and lung titers were determined as described  
7 previously (37). *In vivo* adenovirus transduction with *DPP4* were performed as previously  
8 described (13). For vaccination experiments, 10-20 week old 288-330<sup>+/+</sup> mice were infected with  
9  $10^6$  pfu of MERS dNSP16 as described above, monitored for clinical symptoms for 7 days, and  
10 then challenged 4 weeks post vaccination with  $10^6$  pfu MERS-CoV MA1 passaged virus.  
11 Animal housing, care and experimental protocols were in accordance with University of North  
12 Carolina (UNC) Institutional Animal Care and Use Committee (IACUC) guidelines.

13 **Data Dissemination.** Raw microarray data for these studies were deposited in publicly  
14 available databases in the National Center for Biotechnology Information's (NCBI) Gene  
15 Expression Omnibus (35) and are accessible through GEO Series: GSE65574.  
16 (<http://www.ncbi.nlm.nih.gov/geo/query/acc.cgi?acc=GSE65574>).

### 17 **Acknowledgements**

18 Research was supported by grants from NIAID of the NIH (U19AI100625 to RSB; U19AI106772  
19 to RSB; HHSN272201000019I-HHSN27200003 to RSB; K99AG049092 to VDM). Support for  
20 primary human airway cultures supported by NIH through UNC Cystic Fibrosis Research and  
21 Translation Core Center Cell Models Core at UNC (NIH P30DK065988). The content is solely  
22 the responsibility of the authors and does not necessarily represent the official views of the NIH.  
23 PNNL is operated by Battelle Memorial Institute for the DOE under contract number DE-AC05-  
24 76RLO1830.

25



## 1 **Figure Legends**

2 **Figure 1. NSP16 highly conserved across coronavirus family.** A) NSP16-NSP10 complex  
3 for MERS-CoV. NSP16 (gray) highlighting the conserved KDKE motif (red) required for 2'O  
4 methyl-transferase activity. Also shown, required NSP10 scaffold for MERS-CoV (orange). Inset  
5 displays conserved KDKE (right) as well as D130A (left) mutation that disrupts function.  
6 Homology models were created using Modeller in the Max-Planck Institute's Bioinformatics  
7 Toolkit. The known crystal structure for the NSP10/16 complex (3R24 in the RCSB protein data  
8 bank) was used as the template structure (Chen et al., 2011). Homology models were then  
9 manipulated using MacPyMol. B) Heat maps were constructed from a set of representative  
10 coronaviruses from all four genogroups using alignment data paired with neighbor-joining  
11 phylogenetic trees built in Geneious (v.9.1.5) and visualized in EvolView (evolgenius.info).  
12 Trees show the degree of genetic similarity of NSP16 across CoV families. C & D) Viral  
13 replication of MERS dNSP16 mutant (red) relative to wild-type (WT) MERS-CoV (black) in (C)  
14 Vero cells and (D) Calu3 2B4 cells following MOI 0.01 infection. P-value representative of  
15 Student's T-test with values representing \*\*\* <0.001.

16 **Figure 2. MERS dNSP16 infection produces minimal changes in early host responses.**  
17 Changes in functional host gene clusters based on RNA expression following MOI 5 infection of  
18 Calu3 cells with MERS-CoV dNSP16 (left) or SARS-CoV dNSP16 (right) relative to wild-type  
19 (WT) control virus. Heat-map plots significant enrichment of clustered functional categories (as  
20 determined by DAVID analysis) for each mutant over time. Only marginal changes noted during  
21 the first 24 hours for both SARS and MERS-CoV dNSP16 mutants. After 24 hours (right)  
22 significant changes noted for SARS-CoV; MERS-CoV had significant cytopathic effect after 24  
23 hours post infection precluding analysis.

24 **Figure 3. MERS dNSP16 attenuated in primary cultures and *in vivo*.** A) Primary human  
25 airway epithelial cells infected with wild-type MERS-CoV (black) or dNSP16 mutant (red) at MOI  
26 0.01 and monitored over time course. B) Day 2 and 4 lung titers from adenovirus transduced

1 mice expressing human *DPP4* infected with wild-type MERS-CoV (black) or dNSP16 mutant  
2 (red). C) Day 2 and 4 lung titer from 288-330<sup>+/+</sup> CRISPR mice infected with WT (Black) or  
3 dNSP16 (Red). P-value representative of Student's T-test with values representing \* < 0.05 \*\*  
4 < 0.01 \*\*\* < 0.001.

5 **Figure 4. MERS dNSP16 attenuated by type I IFN treatment via IFIT1.** A) Vero cells treated  
6 with type I IFN (1000u) 16 hours prior to infection with either WT MERS-CoV (black) or dNSP16  
7 mutant (Red). B) Vero cells expressing shRNA targeting *IFIT1* (blue), *IFIT2* (green), or no  
8 shRNA control (black) were pretreated with IFN $\beta$  (PBL Laboratories) and infected with MERS-  
9 CoV (left) or MERS dNSP16 (right). P-values based on Student T-test and are marked as  
10 indicated: \* < 0.05, \*\* < 0.01, \*\*\* < 0.001.

11 **Figure 5. MERS dNSP16 mutants protects from lethal challenge.** A) Weight loss, B) day 4  
12 viral titer, and C) hemorrhage score following challenge of 288-330<sup>+/+</sup> CRISPR/Cas9 mice  
13 vaccinated with wild-type MERS dNSP16 (red) or mock (black) with 10<sup>6</sup> pfu passaged mouse  
14 adapted MERS-CoV (14). D) Plaque reduction neutralization with sera from WT (black) or  
15 dNSP16 (red) vaccinated mice. P-value representative of Student's T-test with values  
16 representing \* < 0.05 \*\* < 0.01 \*\*\* < 0.001.

17 **Figure 6. MERS dNSP16 mutant attenuated in virulent mouse adapted MERS-CoV strain.**  
18 A) Weight loss, B) lung titers, and C) hemorrhage score following infection of 288-330<sup>+/+</sup>  
19 CRISPR/Cas9 mice infected with 10<sup>6</sup> pfu MERS-CoV MA1 (black) or dNSP16 MA1 (red) at  
20 day 2 and 4. C) P-value representative of Student's T-test with values representing \* < 0.05 \*\*  
21 < 0.01 \*\*\* < 0.001.

22

23

## References

1. **Vijay R, Perlman S.** 2016. Middle East respiratory syndrome and severe acute respiratory syndrome. *Curr Opin Virol* **16**:70-76.
2. **Zumla A, Hui DS, Perlman S.** 2015. Middle East respiratory syndrome. *Lancet* **386**:995-1007.
3. **Okba NM, Raj VS, Haagmans BL.** 2017. Middle East respiratory syndrome coronavirus vaccines: current status and novel approaches. *Curr Opin Virol* **23**:49-58.
4. **Majumder MS, Kluberg SA, Mekaru SR, Brownstein JS.** 2015. Mortality Risk Factors for Middle East Respiratory Syndrome Outbreak, South Korea, 2015. *Emerg Infect Dis* **21**:2088-2090.
5. **Menachery VD, Graham RL, Baric RS.** 2017. Jumping species-a mechanism for coronavirus persistence and survival. *Curr Opin Virol* **23**:1-7.
6. **Totura AL, Baric RS.** 2012. SARS coronavirus pathogenesis: host innate immune responses and viral antagonism of interferon. *Curr Opin Virol* **2**:264-275.
7. **Snijder EJ, Decroly E, Ziebuhr J.** 2016. The Nonstructural Proteins Directing Coronavirus RNA Synthesis and Processing. *Adv Virus Res* **96**:59-126.
8. **Menachery VD, Debbink K, Baric RS.** 2014. Coronavirus non-structural protein 16: evasion, attenuation, and possible treatments. *Virus Res* **194**:191-199.
9. **Zust R, Cervantes-Barragan L, Habjan M, Maier R, Neuman BW, Ziebuhr J, Szretter KJ, Baker SC, Barchet W, Diamond MS, Siddell SG, Ludewig B, Thiel V.** 2011. Ribose 2'-O-methylation provides a molecular signature for the distinction of self and non-self mRNA dependent on the RNA sensor Mda5. *Nat Immunol* **12**:137-143.
10. **Menachery VD, Yount BL, Jr., Josset L, Gralinski LE, Scobey T, Agnihothram S, Katze MG, Baric RS.** 2014. Attenuation and restoration of severe acute respiratory syndrome coronavirus mutant lacking 2'-o-methyltransferase activity. *J Virol* **88**:4251-4264.
11. **Decroly E, Imbert I, Coutard B, Bouvet M, Selisko B, Alvarez K, Gorbalenya AE, Snijder EJ, Canard B.** 2008. Coronavirus nonstructural protein 16 is a cap-0 binding enzyme possessing (nucleoside-2'O)-methyltransferase activity. *J Virol* **82**:8071-8084.
12. **Scobey T, Yount BL, Sims AC, Donaldson EF, Agnihothram SS, Menachery VD, Graham RL, Swanstrom J, Bove PF, Kim JD, Grego S, Randell SH, Baric RS.** 2013. Reverse genetics with a full-length infectious cDNA of the Middle East respiratory syndrome coronavirus. *Proc Natl Acad Sci U S A* **110**:16157-16162.
13. **Corti D, Zhao J, Pedotti M, Simonelli L, Agnihothram S, Fett C, Fernandez-Rodriguez B, Foglierini M, Agatic G, Vanzetta F, Gopal R, Langrish CJ, Barrett NA, Sallusto F, Baric RS, Varani L, Zambon M, Perlman S, Lanzavecchia A.** 2015. Prophylactic and postexposure efficacy of a potent human monoclonal antibody against MERS coronavirus. *Proc Natl Acad Sci U S A* **112**:10473-10478.
14. **Cockrell A YB, Scobey T, Jensen K, Douglas M, Beall A, Tang X-C, Marasco WA, Heise MT, Baric RS** 2016. A Mouse Model for MERS Coronavirus Induced Acute Respiratory Distress Syndrome. . *Nature Microbiology* **In Press**.

- 1 15. **Lim SP, Noble CG, Shi PY.** 2015. The dengue virus NS5 protein as a target for drug  
2 discovery. *Antiviral Res* **119**:57-67.
- 3 16. **Caillet-Saguy C, Lim SP, Shi PY, Lescar J, Bressanelli S.** 2014. Polymerases of  
4 hepatitis C viruses and flaviviruses: structural and mechanistic insights and drug  
5 development. *Antiviral Res* **105**:8-16.
- 6 17. **Chang DC, Hoang LT, Mohamed Naim AN, Dong H, Schreiber MJ, Hibberd ML,  
7 Tan MJ, Shi PY.** 2016. Evasion of early innate immune response by 2'-O-methylation  
8 of dengue genomic RNA. *Virology* **499**:259-266.
- 9 18. **Dong H, Chang DC, Hua MH, Lim SP, Chionh YH, Hia F, Lee YH, Kukkaro P, Lok  
10 SM, Dedon PC, Shi PY.** 2012. 2'-O methylation of internal adenosine by flavivirus  
11 NS5 methyltransferase. *PLoS Pathog* **8**:e1002642.
- 12 19. **Zhao Y, Soh TS, Zheng J, Chan KW, Phoo WW, Lee CC, Tay MY, Swaminathan K,  
13 Cornvik TC, Lim SP, Shi PY, Lescar J, Vasudevan SG, Luo D.** 2015. A crystal  
14 structure of the Dengue virus NS5 protein reveals a novel inter-domain interface  
15 essential for protein flexibility and virus replication. *PLoS Pathog* **11**:e1004682.
- 16 20. **Graham RL, Becker MM, Eckerle LD, Bolles M, Denison MR, Baric RS.** 2012. A  
17 live, impaired-fidelity coronavirus vaccine protects in an aged,  
18 immunocompromised mouse model of lethal disease. *Nat Med* **18**:1820-1826.
- 19 21. **Eckerle LD, Becker MM, Halpin RA, Li K, Venter E, Lu X, Scherbakova S, Graham  
20 RL, Baric RS, Stockwell TB, Spiro DJ, Denison MR.** 2010. Infidelity of SARS-CoV  
21 Nsp14-exonuclease mutant virus replication is revealed by complete genome  
22 sequencing. *PLoS Pathog* **6**:e1000896.
- 23 22. **Smith EC, Blanc H, Surdel MC, Vignuzzi M, Denison MR.** 2013. Coronaviruses  
24 lacking exoribonuclease activity are susceptible to lethal mutagenesis: evidence for  
25 proofreading and potential therapeutics. *PLoS Pathog* **9**:e1003565.
- 26 23. **Lamirande EW, DeDiego ML, Roberts A, Jackson JP, Alvarez E, Sheahan T, Shieh  
27 WJ, Zaki SR, Baric R, Enjuanes L, Subbarao K.** 2008. A live attenuated severe acute  
28 respiratory syndrome coronavirus is immunogenic and efficacious in golden Syrian  
29 hamsters. *J Virol* **82**:7721-7724.
- 30 24. **Netland J, DeDiego ML, Zhao J, Fett C, Alvarez E, Nieto-Torres JL, Enjuanes L,  
31 Perlman S.** 2010. Immunization with an attenuated severe acute respiratory  
32 syndrome coronavirus deleted in E protein protects against lethal respiratory  
33 disease. *Virology* **399**:120-128.
- 34 25. **Becares M, Pascual-Iglesias A, Nogales A, Sola I, Enjuanes L, Zuniga S.** 2016.  
35 Mutagenesis of Coronavirus nsp14 Reveals Its Potential Role in Modulation of the  
36 Innate Immune Response. *J Virol* **90**:5399-5414.
- 37 26. **Almazan F, DeDiego ML, Sola I, Zuniga S, Nieto-Torres JL, Marquez-Jurado S,  
38 Andres G, Enjuanes L.** 2013. Engineering a replication-competent, propagation-  
39 defective Middle East respiratory syndrome coronavirus as a vaccine candidate.  
40 *MBio* **4**:e00650-00613.
- 41 27. **Ortego J, Escors D, Laude H, Enjuanes L.** 2002. Generation of a replication-  
42 competent, propagation-deficient virus vector based on the transmissible  
43 gastroenteritis coronavirus genome. *J Virol* **76**:11518-11529.
- 44 28. **Fischer F, Stegen CF, Masters PS, Samsonoff WA.** 1998. Analysis of constructed E  
45 gene mutants of mouse hepatitis virus confirms a pivotal role for E protein in  
46 coronavirus assembly. *J Virol* **72**:7885-7894.

- 1 29. **Bolles M, Deming D, Long K, Agnihothram S, Whitmore A, Ferris M,**  
2 **Funkhouser W, Gralinski L, Tatura A, Heise M, Baric RS.** 2011. A double-  
3 inactivated severe acute respiratory syndrome coronavirus vaccine provides  
4 incomplete protection in mice and induces increased eosinophilic proinflammatory  
5 pulmonary response upon challenge. *J Virol* **85**:12201-12215.
- 6 30. **Menachery VD, Yount BL, Jr., Debbink K, Agnihothram S, Gralinski LE, Plante**  
7 **JA, Graham RL, Scobey T, Ge XY, Donaldson EF, Randell SH, Lanzavecchia A,**  
8 **Marasco WA, Shi ZL, Baric RS.** 2015. A SARS-like cluster of circulating bat  
9 coronaviruses shows potential for human emergence. *Nat Med* **21**:1508-1513.
- 10 31. **Menachery VD, Yount BL, Jr., Sims AC, Debbink K, Agnihothram SS, Gralinski**  
11 **LE, Graham RL, Scobey T, Plante JA, Royal SR, Swanstrom J, Sheahan TP,**  
12 **Pickles RJ, Corti D, Randell SH, Lanzavecchia A, Marasco WA, Baric RS.** 2016.  
13 SARS-like WIV1-CoV poised for human emergence. *Proc Natl Acad Sci U S A*  
14 **113**:3048-3053.
- 15 32. **Sheahan T, Whitmore A, Long K, Ferris M, Rockx B, Funkhouser W, Donaldson**  
16 **E, Gralinski L, Collier M, Heise M, Davis N, Johnston R, Baric RS.** 2011. Successful  
17 vaccination strategies that protect aged mice from lethal challenge from influenza  
18 virus and heterologous severe acute respiratory syndrome coronavirus. *J Virol*  
19 **85**:217-230.
- 20 33. **Jimenez-Guardeno JM, Regla-Nava JA, Nieto-Torres JL, DeDiego ML, Castano-**  
21 **Rodriguez C, Fernandez-Delgado R, Perlman S, Enjuanes L.** 2015. Identification  
22 of the Mechanisms Causing Reversion to Virulence in an Attenuated SARS-CoV for  
23 the Design of a Genetically Stable Vaccine. *PLoS Pathog* **11**:e1005215.
- 24 34. **Li C, Bankhead A, 3rd, Einfeld AJ, Hatta Y, Jeng S, Chang JH, Aicher LD, Proll S,**  
25 **Ellis AL, Law GL, Waters KM, Neumann G, Katze MG, McWeeney S, Kawaoka Y.**  
26 2011. Host regulatory network response to infection with highly pathogenic H5N1  
27 avian influenza virus. *J Virol* **85**:10955-10967.
- 28 35. **Sims AC, Tilton SC, Menachery VD, Gralinski LE, Schafer A, Matzke MM, Webb-**  
29 **Robertson BJ, Chang J, Luna ML, Long CE, Shukla AK, Bankhead AR, 3rd,**  
30 **Burkett SE, Zornetzer G, Tseng CT, Metz TO, Pickles R, McWeeney S, Smith RD,**  
31 **Katze MG, Waters KM, Baric RS.** 2013. Release of severe acute respiratory  
32 syndrome coronavirus nuclear import block enhances host transcription in human  
33 lung cells. *J Virol* **87**:3885-3902.
- 34

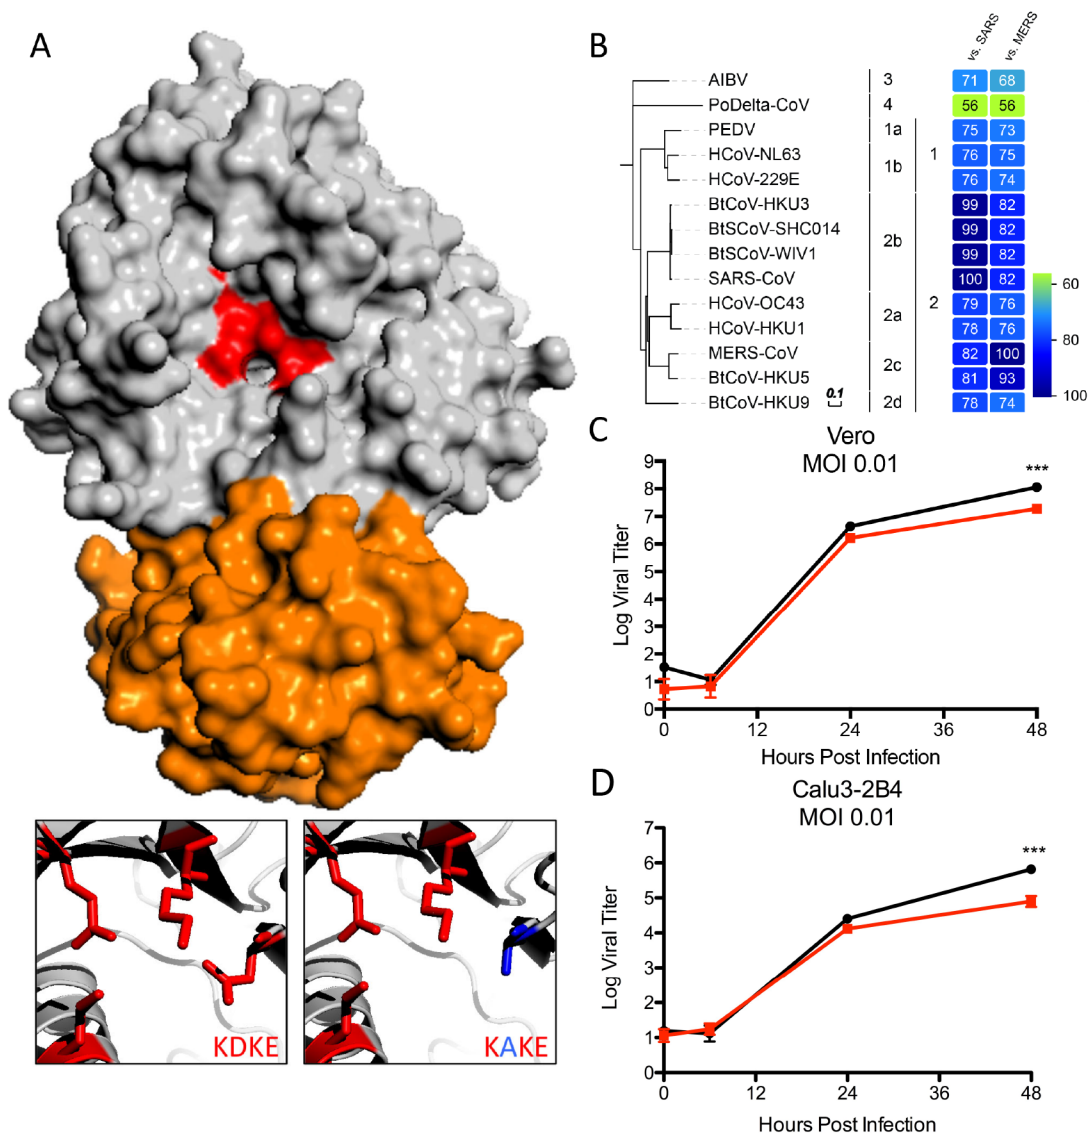

**Figure 1. NSP16 highly conserved across coronavirus family.** A) NSP16-NSP10 complex for MERS-CoV. NSP16 (gray) highlighting the conserved KDKE motif (red) required for 2' O methyltransferase activity. Also shown, required NSP10 scaffold for MERS-CoV (orange). Inset displays conserved KDKE (right) as well as D130A (left) mutation that disrupts function. Homology models were created using Modeller in the Max-Planck Institute's Bioinformatics Toolkit. The known crystal structure for the NSP10/16 complex (3R24 in the RCSB protein data bank) was used as the template structure (Chen et al., 2011). Homology models were then manipulated using MacPyMol. B) Heat maps were constructed from a set of representative coronaviruses from all four genogroups using alignment data paired with neighbor-joining phylogenetic trees built in Geneious (v.9.1.5) and visualized in EvoView (evolgenius.info). Trees show the degree of genetic similarity of NSP16 across CoV families. C & D) Viral replication of MERS dNSP16 mutant (red) relative to wild-type (WT) MERS-CoV (black) in (C) Vero cells and (D) Calu3 2B4 cells following MOI 0.01 infection. P-value representative of Student's T-test with values representing \*\*\* <0.001.

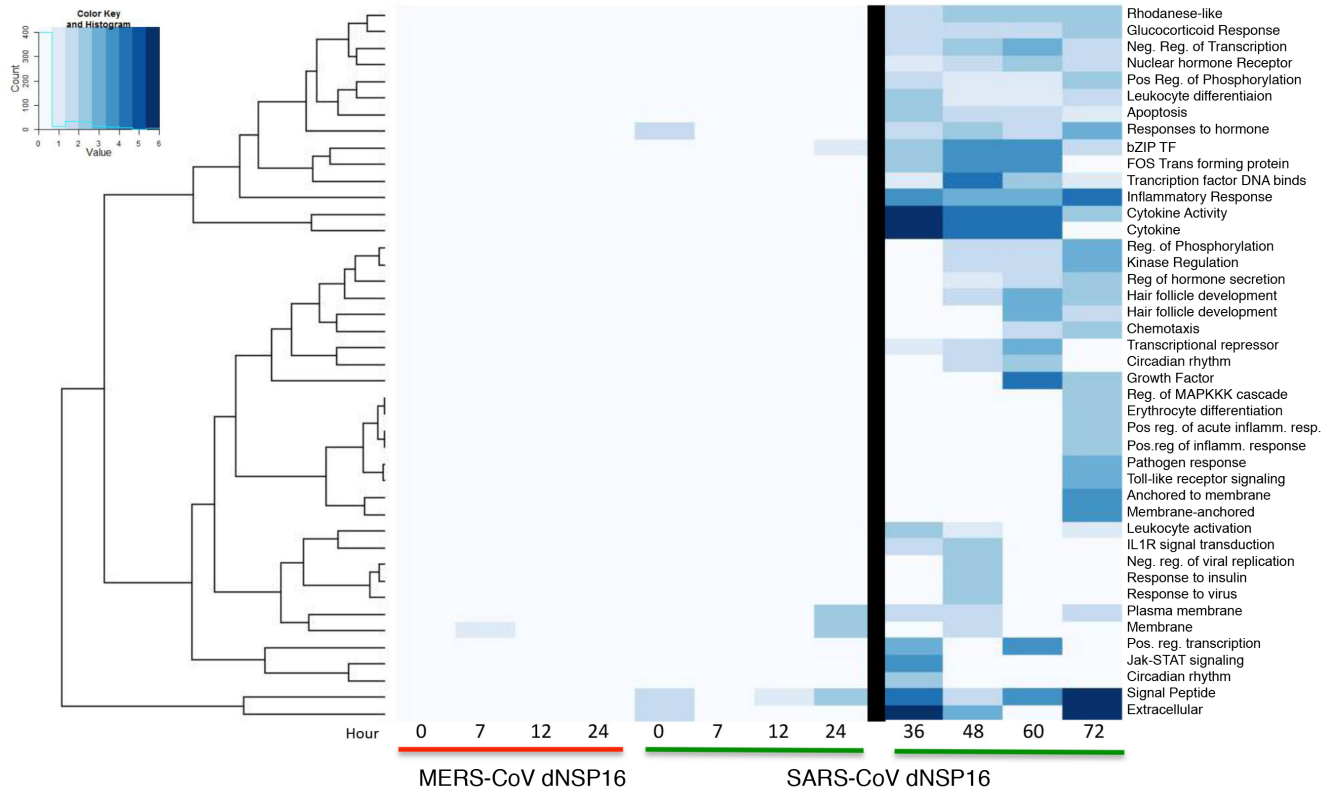

**Figure 2. MERS dNSP16 infection produces minimal changes in early host responses.** Changes in functional host gene clusters based on RNA expression following MOI 5 infection of Calu3 cells with MERS-CoV dNSP16 (left) or SARS-CoV dNSP16 (right) relative to wild-type (WT) control virus. Heat-map plots significant enrichment of clustered functional categories (as determined by DAVID analysis) for each mutant over time. Only marginal changes noted during the first 24 hours for both SARS and MERS-CoV dNSP16 mutants. After 24 hours (right) significant changes noted for SARS-CoV; MERS-CoV had significant cytopathic effect after 24 hours post infection precluding analysis.

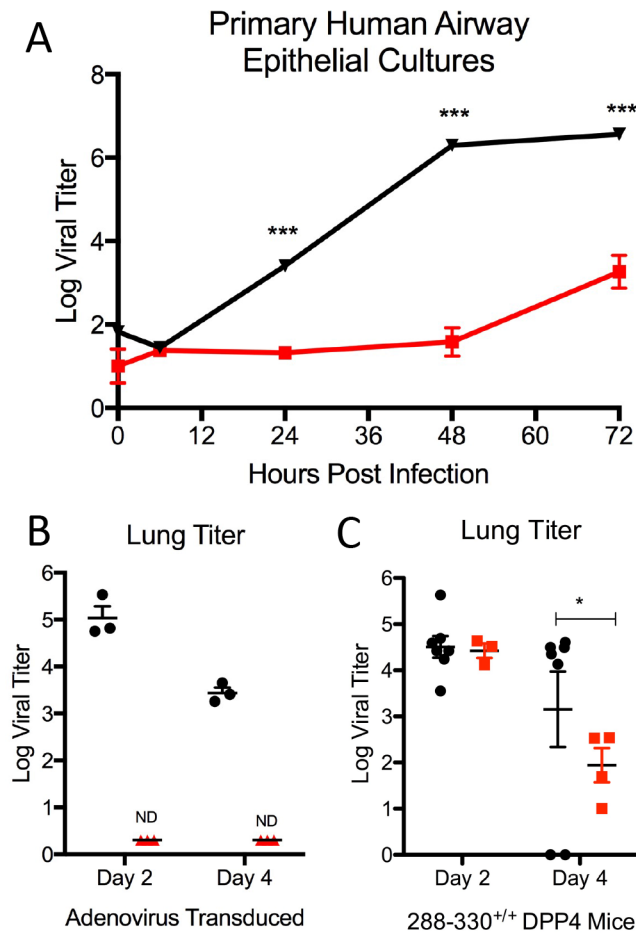

**Figure 3. MERS dNSP16 attenuated in primary cultures and *in vivo*.** A) Primary human airway epithelial cells infected with wild-type MERS-CoV (black) or dNSP16 mutant (red) at MOI 0.01 and monitored over time course. B) Day 2 and 4 lung titers from adenovirus transduced mice expressing human *DPP4* infected with wild-type MERS-CoV (black) or dNSP16 mutant (red). C) Day 2 and 4 lung titer from 288-330<sup>+/+</sup> CRISPR mice infected with WT (Black) or dNSP16 (Red). P-value representative of Student's T-test with values representing \* < 0.05 \*\* < 0.01 \*\*\* < 0.001.



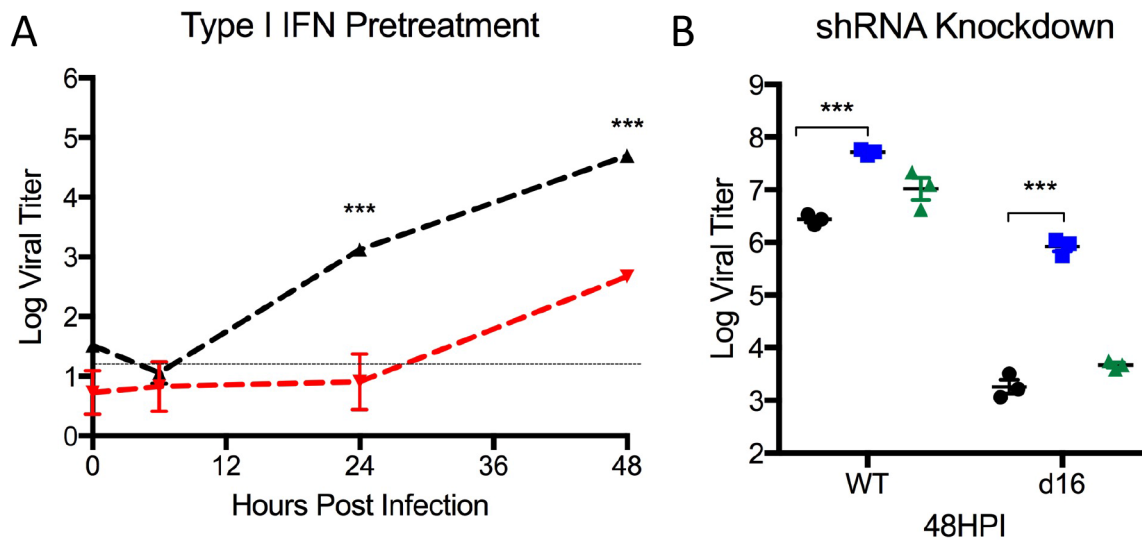

**Figure 4. MERS dNSP16 attenuated by type I IFN treatment via IFIT1.** A) Vero cells treated with type I IFN (1000u) 16 hours prior to infection with either WT MERS-CoV (black) or dNSP16 mutant (Red). B) Vero cells expressing shRNA targeting *IFIT1* (blue), *IFIT2* (green), or no shRNA control (black) were pretreated with IFN $\beta$  (PBL Laboratories) and infected with MERS-CoV (left) or MERS dNSP16 (right). P-values based on Student T-test and are marked as indicated: \* $<0.05$ , \*\* $<0.01$ , \*\*\* $<0.001$ .

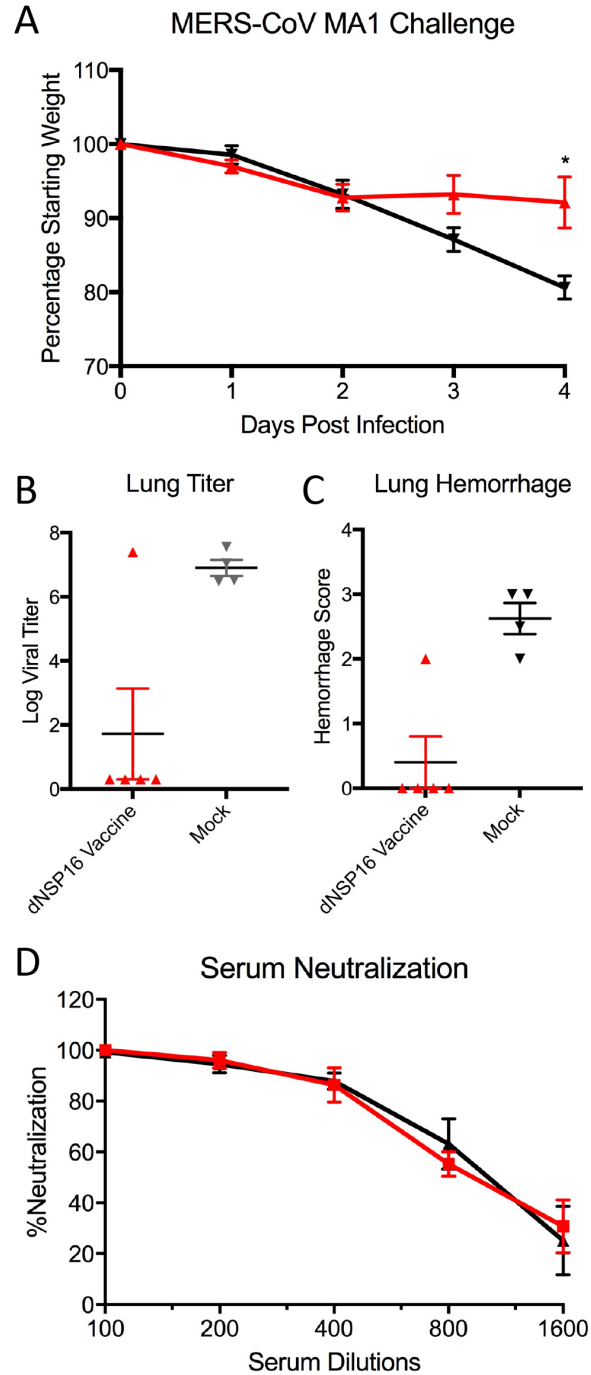

**Figure 5. MERS dNSP16 mutants protects from lethal challenge.** A) Weight loss, B) day 4 viral titer, and C) hemorrhage score following challenge of 288-330+/+ CRISPR/Cas9 mice vaccinated with wild-type MERS dNSP16 (red) or mock (black) with  $10^6$  pfu passaged mouse adapted MERS-CoV (14). D) Plaque reduction neutralization with sera from WT (black) or dNSP16 (red) vaccinated mice. P-value representative of Student's T-test with values representing \* < 0.05 \*\* < 0.01 \*\*\* < 0.001.

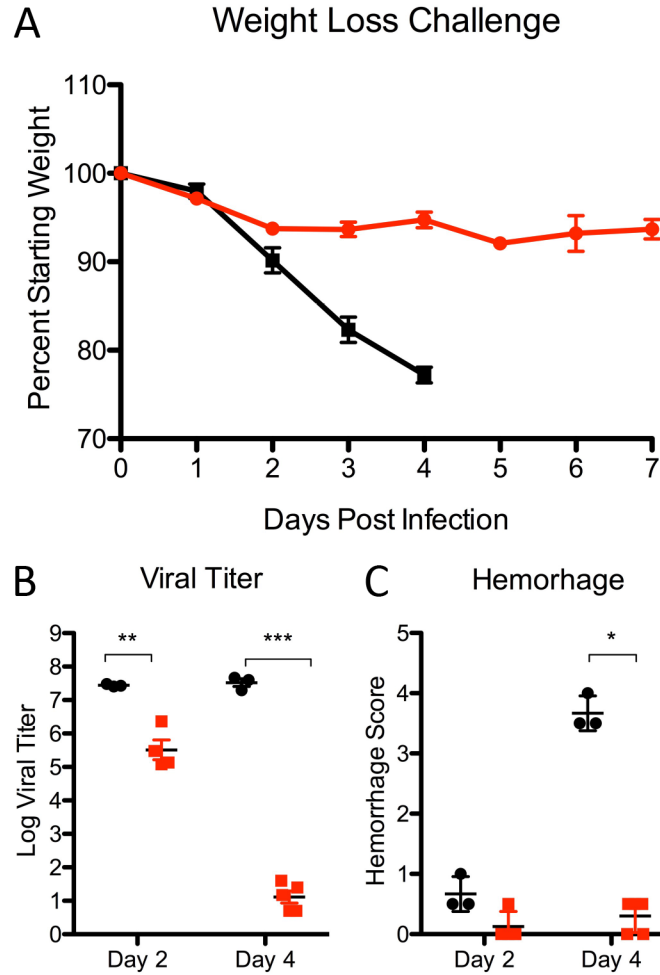

**Figure 6. MERS dNSP16 mutant attenuated in virulent mouse adapted MERS-CoV strain.** A) Weight loss, B) lung titers, and C) hemorrhage score following infection of 288-330<sup>+/+</sup> CRISPR/Cas9 mice infected with 10<sup>6</sup> pfu MERS-CoV MA1 (black) or dNSP16 MA1 (red) at day 2 and 4. C) P-value representative of Student's T-test with values representing \* < 0.05 \*\* < 0.01 \*\*\* < 0.001.
